# Supplementary material for: Competition‐Based Benchmarking of Influence Ranking Methods in Social Networks
Source: Hindawi journal article supplement (doi:10.1155/2018/4562609), 2018-01-01
Supplement: f1 [file 4562609.f1.pdf]

1 **Supplementary Information**  
2 **Competition-Based Benchmarking of Influence Ranking**  
3 **Methods in Social Networks**

4 **Alexandru Topîrceanu**

5 **Contents**

|    |          |                                                                                          |          |
|----|----------|------------------------------------------------------------------------------------------|----------|
| 6  | <b>1</b> | <b>Node overlapping correlation change as the number of selected spreaders increases</b> | <b>2</b> |
| 7  | <b>2</b> | <b>Node overlapping in terms of selected spreaders</b>                                   | <b>3</b> |
| 8  | <b>3</b> | <b>Competition-based benchmarking results</b>                                            | <b>3</b> |
| 9  | <b>4</b> | <b>Ranking method performances on each dataset for individual SIR benchmarking</b>       | <b>6</b> |
| 10 | <b>5</b> | <b>Ranking method performances on each dataset for competition-based benchmarking</b>    | <b>6</b> |
| 11 | <b>6</b> | <b>Alternative selection strategy for multiple spreaders</b>                             | <b>7</b> |
| 12 |          | <b>References</b>                                                                        | <b>9</b> |

# 1 Node overlapping correlation change as the number of selected spreaders increases

Given the four synthetic networks (10,000 nodes), we alternatively measure the amount of node overlapping for 10 selected influence ranking methods. These methods are: node degree centrality (Deg), closeness (CIs)<sup>1</sup>, node betweenness (Btw)<sup>2</sup>, HITS<sup>3</sup>, PageRank (PR)<sup>4</sup>, Hirsch index (HI)<sup>5</sup>, LeaderRank (LR)<sup>6</sup>, K-shell decomposition (KS)<sup>7</sup>, Local centrality with a coefficient (CLC)<sup>8</sup>, and Eigenvector centrality (EC)<sup>9</sup>.

The 10 mentioned centralities are applied in order to select the top  $p\%$  spreaders in each network, for values of  $p \in \{0.01, 0.05, 0.1\}$ . Figure 1 shows the change in correlation (node overlapping) by increasing  $p = 0.01$  to  $p = 0.1$ . The correlation between most centralities will drop as  $p$  increases. The average changes in correlations from  $p = 0.01$  up to  $p = 0.1$  are:  $\delta_{Rand} = -0.289$ ,  $\delta_{Mesh} = -0.193$ ,  $\delta_{SW} = -0.189$ , and  $\delta_{SF} = -0.088$ .

The upper panel of Figure 1 shows the correlation drop grouped by centrality measures, and the lower panel of Figure 1 groups the results by topology. We notice that the scale-free network has the lowest drop in correlation. This can be explained by the existence of hubs in the network, and the fact that most centralities will select those few nodes within the top  $p\%$  spreader set. This is why, even if the spreader pool increases to 10% of the network, the same spreaders are selected, so the correlation remains high and mostly unaltered.

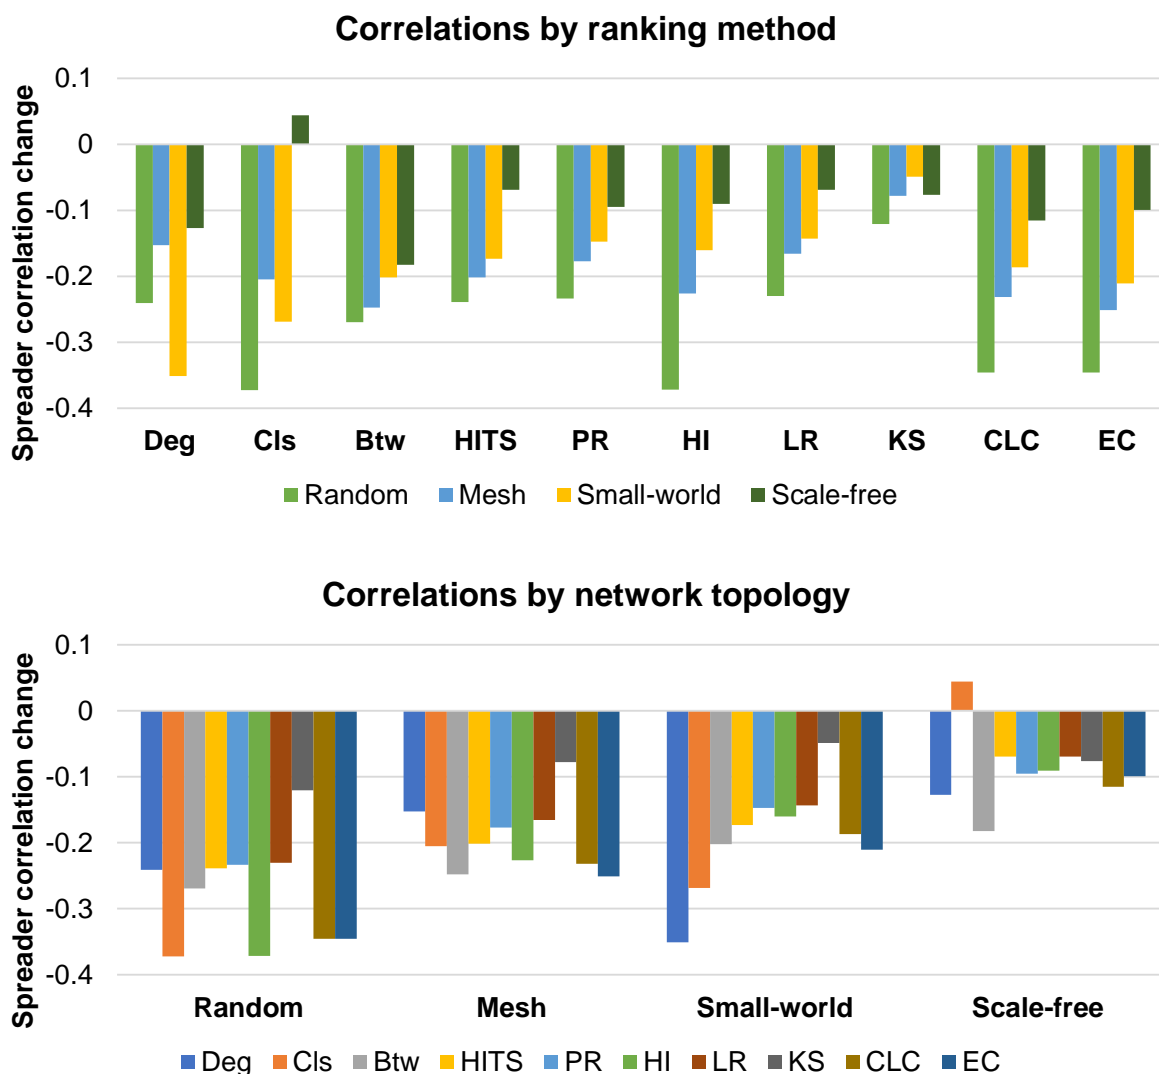

**Figure 1.** Changes in correlation (node overlapping) between ranking methods by increasing the spreader size from 1% to 10% of the total network size. Each synthetic network has  $N = 10,000$  nodes.

On the other hand, the random network produces a significant drop in correlation. This is due to the fact that, as more nodes are introduced in the spreader pool, more randomness is introduced, so the overlapping drops naturally. In an analogous manner,

29 the mesh network also has a high correlation drop, and this is due to the fact that influential nodes tend to have a uniform spatial  
30 distribution. Selecting a larger spreader size, incurs higher overall diversity, as in a Gaussian distributed population. Finally,  
31 the small-world network is similar to a mesh network with an additional set of long range links (< 15%), so it performs very  
32 similar to the mesh topology.

33 We can conclude that only the scale-free property has a more characteristic response, due to its small subset of hub nodes,  
34 which naturally represents around 1 – 10% of the network size.

## 35 2 Node overlapping in terms of selected spreaders

36 Figure 2 exemplifies the spatial distribution of four selected centralities (degree, closeness, betweenness and PageRank) on  
37 the mesh topology, as they are used to select the top 1% nodes as spreaders. With this example we highlight the change in  
38 diversity of spreader positioning between the various ranking methods. In the selected example, degree and PageRank have  
39 similar spatial distributions, while Closeness is consistently different.

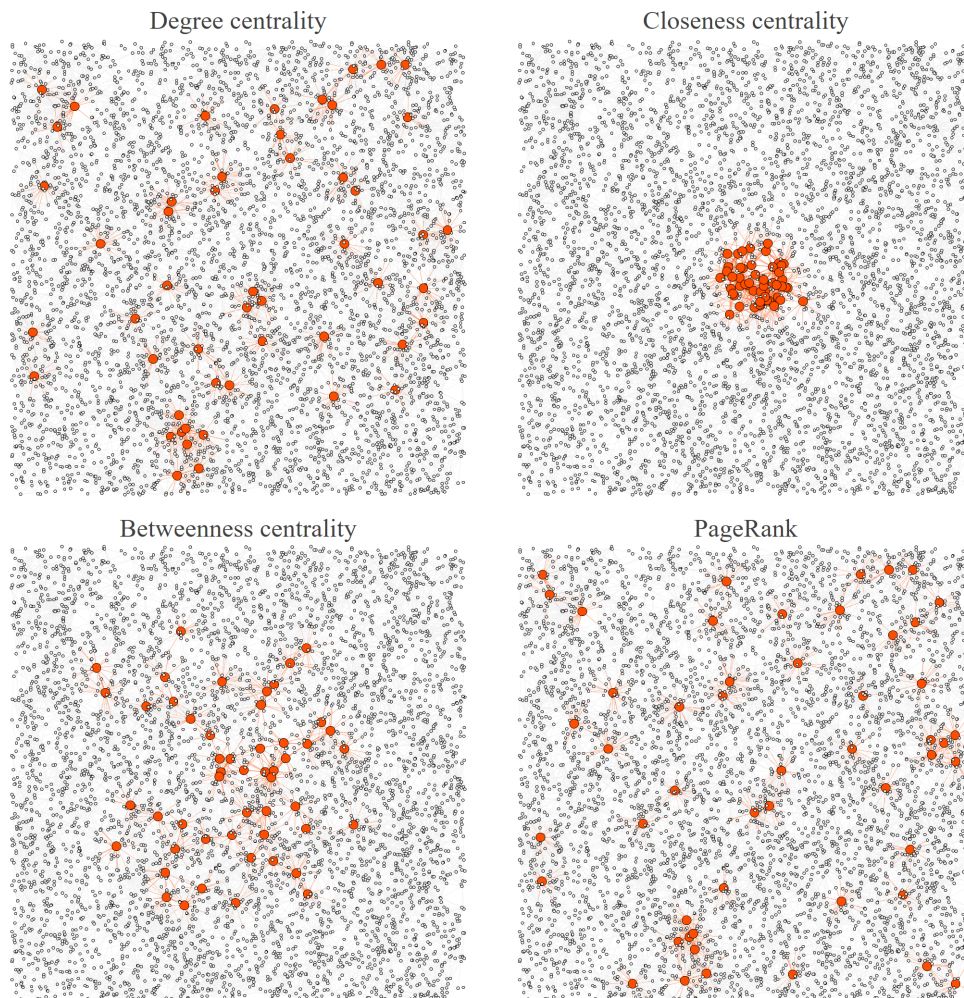

**Figure 2.** Spatial distribution of selected spreader nodes on the mesh network with  $N = 10,000$  nodes. The top 1% nodes are highlighted as spreaders, as determined by the degree, closeness, betweenness and PageRank centralities.

## 40 3 Competition-based benchmarking results

41 Tables 1 and 2 contain the main detailed benchmarking simulation results of the paper. Each of the 8 datasets has one  
42 independent sub-table containing  $10 \times 10$  averaged simulation sets between the following centrality measures: : node degree  
43 centrality (Deg), closeness (CIs), node betweenness (Btw), HITS, PageRank (PR), Hirsch index (HI), LeaderRank (LR), **K-shell**  
44 **decomposition (KS)**, Local centrality with a coefficient (CLC), and Eigenvector centrality (EC).

**Table 1.** Synthetic dataset (random, mesh, small-world, scale-free) benchmark results for pair-wise competition between centrality measures. Each cell  $(x,y)$  contains the final opinion coverage (0 – 100%) for centrality  $x$ ; the symmetric cell  $(y,x)$  represents the same number on a colour gradient blue (0%)–white (50%)–orange (100%).

| <b>Random</b> | Deg | Cls   | Btw  | HITS | PR   | HI    | LR    | KS    | CLC   | EC    | Avg          |
|---------------|-----|-------|------|------|------|-------|-------|-------|-------|-------|--------------|
| Deg           | -   | 98.50 | 1.82 | 0.98 | 1.00 | 98.90 | 98.10 | 99.02 | 98.78 | 98.56 | 66.18        |
| Cls           |     | -     | 1.30 | 1.48 | 1.50 | 98.12 | 1.74  | 98.76 | 1.30  | 1.36  | 23.02        |
| Btw           |     |       | -    | 1.30 | 1.60 | 98.80 | 97.84 | 98.82 | 98.52 | 98.60 | 66.15        |
| HITS          |     |       |      | -    | 1.38 | 98.84 | 1.24  | 99.10 | 98.78 | 98.62 | 66.28        |
| PR            |     |       |      |      | -    | 98.50 | 2.10  | 99.14 | 98.74 | 98.46 | <b>77.16</b> |
| HI            |     |       |      |      |      | -     | 1.78  | 98.36 | 1.18  | 1.00  | 12.13        |
| LR            |     |       |      |      |      |       | -     | 98.90 | 98.24 | 98.68 | 76.95        |
| KS            |     |       |      |      |      |       |       | -     | 0.98  | 0.82  | 0.99         |
| CLC           |     |       |      |      |      |       |       |       | -     | 98.86 | 33.93        |
| EC            |     |       |      |      |      |       |       |       |       | -     | 23.12        |

| <b>Mesh</b> | Deg | Cls   | Btw   | HITS  | PR    | HI    | LR    | KS    | CLC   | EC    | Avg          |
|-------------|-----|-------|-------|-------|-------|-------|-------|-------|-------|-------|--------------|
| Deg         | -   | 95.36 | 78.74 | 57.00 | 56.22 | 78.04 | 56.72 | 72.66 | 62.46 | 84.18 | <b>71.26</b> |
| Cls         |     | -     | 3.04  | 4.66  | 5.54  | 5.20  | 4.94  | 5.46  | 5.36  | 10.64 | 5.47         |
| Btw         |     |       | -     | 19.74 | 22.14 | 33.60 | 23.92 | 79.56 | 44.30 | 44.36 | 42.93        |
| HITS        |     |       |       | -     | 52.80 | 70.60 | 45.88 | 79.92 | 63.70 | 88.00 | 69.32        |
| PR          |     |       |       |       | -     | 65.52 | 44.56 | 71.00 | 67.66 | 73.60 | 65.35        |
| HI          |     |       |       |       |       | -     | 33.10 | 51.12 | 41.14 | 82.38 | 52.82        |
| LR          |     |       |       |       |       |       | -     | 77.54 | 62.46 | 79.60 | 67.57        |
| KS          |     |       |       |       |       |       |       | -     | 41.74 | 47.46 | 39.65        |
| CLC         |     |       |       |       |       |       |       |       | -     | 78.90 | 52.36        |
| EC          |     |       |       |       |       |       |       |       |       | -     | 32.96        |

| <b>SW</b> | Deg | Cls   | Btw   | HITS  | PR    | HI    | LR    | KS    | CLC   | EC    | Avg          |
|-----------|-----|-------|-------|-------|-------|-------|-------|-------|-------|-------|--------------|
| Deg       | -   | 89.42 | 66.94 | 60.16 | 34.58 | 78.56 | 66.60 | 70.36 | 79.36 | 74.44 | 68.94        |
| Cls       |     | -     | 9.10  | 5.82  | 12.82 | 11.58 | 16.26 | 23.06 | 8.02  | 8.24  | 11.39        |
| Btw       |     |       | -     | 21.24 | 47.48 | 43.40 | 44.88 | 79.66 | 59.80 | 84.14 | 56.96        |
| HITS      |     |       |       | -     | 54.06 | 90.58 | 71.60 | 86.02 | 52.20 | 93.02 | <b>76.92</b> |
| PR        |     |       |       |       | -     | 74.38 | 48.36 | 74.24 | 87.24 | 61.00 | 71.93        |
| HI        |     |       |       |       |       | -     | 51.38 | 83.24 | 39.54 | 31.06 | 33.25        |
| LR        |     |       |       |       |       |       | -     | 86.60 | 54.28 | 82.06 | 66.72        |
| KS        |     |       |       |       |       |       |       | -     | 47.10 | 25.32 | 37.87        |
| CLC       |     |       |       |       |       |       |       |       | -     | 41.96 | 60.24        |
| EC        |     |       |       |       |       |       |       |       |       | -     | 39.43        |

| <b>SF</b> | Deg | Cls   | Btw   | HITS  | PR    | HI    | LR    | KS    | CLC   | EC    | Avg          |
|-----------|-----|-------|-------|-------|-------|-------|-------|-------|-------|-------|--------------|
| Deg       | -   | 98.22 | 46.16 | 42.12 | 59.30 | 47.64 | 52.50 | 61.42 | 79.70 | 68.30 | <b>61.71</b> |
| Cls       |     | -     | 1.82  | 1.72  | 1.80  | 1.82  | 1.80  | 1.88  | 1.90  | 1.86  | 1.83         |
| Btw       |     |       | -     | 43.08 | 40.48 | 63.96 | 38.60 | 87.92 | 80.80 | 71.34 | 62.78        |
| HITS      |     |       |       | -     | 54.54 | 48.84 | 50.24 | 61.92 | 79.80 | 72.42 | 61.63        |
| PR        |     |       |       |       | -     | 52.96 | 31.20 | 52.44 | 80.84 | 67.76 | 55.74        |
| HI        |     |       |       |       |       | -     | 35.18 | 70.44 | 87.66 | 66.64 | 54.72        |
| LR        |     |       |       |       |       |       | -     | 62.88 | 79.66 | 72.84 | 61.53        |
| KS        |     |       |       |       |       |       |       | -     | 64.06 | 41.78 | 45.89        |
| CLC       |     |       |       |       |       |       |       |       | -     | 14.08 | 26.99        |
| EC        |     |       |       |       |       |       |       |       |       | -     | 43.09        |

**Table 2.** Real-world dataset benchmark results for pair-wise competition between centrality measures. Each cell  $(x,y)$  contains the final opinion coverage (0 – 100%) for centrality  $x$ ; the symmetric cell  $(y,x)$  represents the same number on a colour gradient blue (0%)–white (50%)–orange (100%).

| OSN  | Deg | Cls   | Btw   | HITS  | PR    | HI    | LR    | KS    | CLC   | EC    | Avg          |
|------|-----|-------|-------|-------|-------|-------|-------|-------|-------|-------|--------------|
| Deg  | -   | 97.52 | 78.35 | 8.16  | 81.99 | 92.20 | 7.68  | 88.31 | 11.79 | 8.84  | 52.76        |
| Cls  |     | -     | 1.79  | 1.31  | 2.21  | 3.94  | 1.42  | 2.73  | 4.42  | 2.52  | 2.55         |
| Btw  |     |       | -     | 13.05 | 12.42 | 90.36 | 13.58 | 90.52 | 15.79 | 15.90 | 40.37        |
| HITS |     |       |       | -     | 82.67 | 89.46 | 10.26 | 91.67 | 89.67 | 17.58 | <b>64.42</b> |
| PR   |     |       |       |       | -     | 18.79 | 13.79 | 90.25 | 16.01 | 16.22 | 41.08        |
| HI   |     |       |       |       |       | -     | 7.53  | 7.16  | 4.31  | 5.63  | 24.23        |
| LR   |     |       |       |       |       |       | -     | 92.15 | 91.15 | 17.21 | 64.39        |
| KS   |     |       |       |       |       |       |       | -     | 11.37 | 12.11 | 28.77        |
| CLC  |     |       |       |       |       |       |       |       | -     | 12.48 | 44.74        |
| EC   |     |       |       |       |       |       |       |       |       | -     | 62.83        |

| FB   | Deg | Cls   | Btw   | HITS  | PR    | HI    | LR    | KS    | CLC   | EC    | Avg          |
|------|-----|-------|-------|-------|-------|-------|-------|-------|-------|-------|--------------|
| Deg  | -   | 96.59 | 66.86 | 36.97 | 35.49 | 69.54 | 30.17 | 69.45 | 30.58 | 69.95 | 56.18        |
| Cls  |     | -     | 3.49  | 3.56  | 5.26  | 3.53  | 4.98  | 70.23 | 5.23  | 3.53  | 11.49        |
| Btw  |     |       | -     | 34.45 | 42.68 | 74.59 | 56.52 | 73.67 | 57.09 | 48.23 | 57.51        |
| HITS |     |       |       | -     | 57.18 | 70.21 | 31.58 | 70.33 | 37.04 | 69.92 | 62.10        |
| PR   |     |       |       |       | -     | 70.21 | 39.53 | 70.20 | 43.85 | 69.89 | 55.99        |
| HI   |     |       |       |       |       | -     | 29.76 | 70.01 | 29.79 | 30.55 | 41.36        |
| LR   |     |       |       |       |       |       | -     | 70.23 | 64.50 | 68.89 | <b>68.06</b> |
| KS   |     |       |       |       |       |       |       | -     | 29.66 | 30.48 | 28.87        |
| CLC  |     |       |       |       |       |       |       |       | -     | 69.29 | 55.91        |
| EC   |     |       |       |       |       |       |       |       |       | -     | 44.54        |

| Emails | Deg | Cls   | Btw   | HITS  | PR    | HI    | LR    | KS    | CLC   | EC    | Avg          |
|--------|-----|-------|-------|-------|-------|-------|-------|-------|-------|-------|--------------|
| Deg    | -   | 98.66 | 56.89 | 49.70 | 47.79 | 69.91 | 50.17 | 68.05 | 64.76 | 65.75 | 63.52        |
| Cls    |     | -     | 1.06  | 1.08  | 1.06  | 5.97  | 1.07  | 2.08  | 6.17  | 2.03  | 2.40         |
| Btw    |     |       | -     | 40.81 | 40.87 | 68.12 | 40.79 | 67.22 | 63.61 | 63.59 | 58.33        |
| HITS   |     |       |       | -     | 48.01 | 70.00 | 50.01 | 67.31 | 64.64 | 65.71 | 63.56        |
| PR     |     |       |       |       | -     | 69.07 | 51.14 | 67.66 | 63.75 | 64.00 | 63.55        |
| HI     |     |       |       |       |       | -     | 29.91 | 48.16 | 30.17 | 33.52 | 39.60        |
| LR     |     |       |       |       |       |       | -     | 71.41 | 65.18 | 65.04 | <b>63.97</b> |
| KS     |     |       |       |       |       |       |       | -     | 36.00 | 38.26 | 42.07        |
| CLC    |     |       |       |       |       |       |       |       | -     | 44.46 | 48.43        |
| EC     |     |       |       |       |       |       |       |       |       | -     | 51.49        |

| POK  | Deg | Cls   | Btw   | HITS  | PR    | HI    | LR    | KS    | CLC   | EC    | Avg          |
|------|-----|-------|-------|-------|-------|-------|-------|-------|-------|-------|--------------|
| Deg  | -   | 71.00 | 50.12 | 55.34 | 41.23 | 80.42 | 35.59 | 89.36 | 73.23 | 73.21 | 63.28        |
| Cls  |     | -     | 38.60 | 29.16 | 31.01 | 53.54 | 28.27 | 84.58 | 53.74 | 62.13 | 45.78        |
| Btw  |     |       | -     | 47.22 | 39.32 | 59.18 | 50.48 | 92.35 | 68.10 | 58.49 | 58.27        |
| HITS |     |       |       | -     | 45.48 | 70.45 | 37.91 | 93.26 | 71.85 | 80.42 | 63.09        |
| PR   |     |       |       |       | -     | 70.01 | 52.25 | 90.52 | 69.56 | 75.22 | 63.94        |
| HI   |     |       |       |       |       | -     | 21.17 | 85.66 | 30.62 | 45.73 | 36.30        |
| LR   |     |       |       |       |       |       | -     | 89.89 | 72.35 | 77.46 | <b>66.87</b> |
| KS   |     |       |       |       |       |       |       | -     | 14.11 | 19.11 | 13.33        |
| CLC  |     |       |       |       |       |       |       |       | -     | 79.53 | 48.01        |
| EC   |     |       |       |       |       |       |       |       |       | -     | 32.27        |

Each numerical cell  $(x,y)$  in the tables represents the opinion coverage (0 – 100%) for centrality  $x$  (versus  $y$ ) at the end of each simulation, after balancing is attained<sup>10</sup> in our tolerance diffusion model<sup>11</sup>. The table cells are symmetrical, meaning that each colour cell  $(y,x)$  represents the same percentage on a colour gradient blue (0%)–white (50%)–orange (100%) For example, the values and colours are interpreted as follows: in the Emails dataset in Table 2, we obtain the result HI-LR=29.91, meaning that HI obtains 29.91% coverage in the network, while LR obtains the rest of  $100 - 29.91 = 70.09\%$  coverage. Accordingly, cell LR-HI is coloured in a light blue, meaning that the first centrality wins (*i.e.*, by 70.09%). Also, the numerical values in each cell take into consideration AOA, meaning that simulations were automatically run in both scenarios where HI had priority in assigning spreaders, then LR had priority over HI.

Each cell in Tables 1-2 corresponds to a total of 10 repeated simulation batches (*i.e.*, translating into 20 because of AOA), thus a sub-table comprises a total of  $45 \times 20 = 900$  simulations, amassing to an overall  $8 \times 900 = 7,200$  unique simulations.

#### 4 Ranking method performances on each dataset for individual SIR benchmarking

In Figure 3 we highlight the low numerical differentiation provided by testing influence ranking methods in an individual context with SIR epidemic diffusion<sup>12,13</sup>. The performance is expressed as percentage of final coverage at the end of a SIR epidemic diffusion. Overall, there is no visual cue suggesting that ranking methods perform any different on, *e.g.*, the SW topology (grey bars in Figure 3). In other words, we cannot reliably rank node centralities on a given topology. We can only rank the spreading ability when comparing different topologies, like for example, the Facebook dataset is covered to a larger extent than POK.

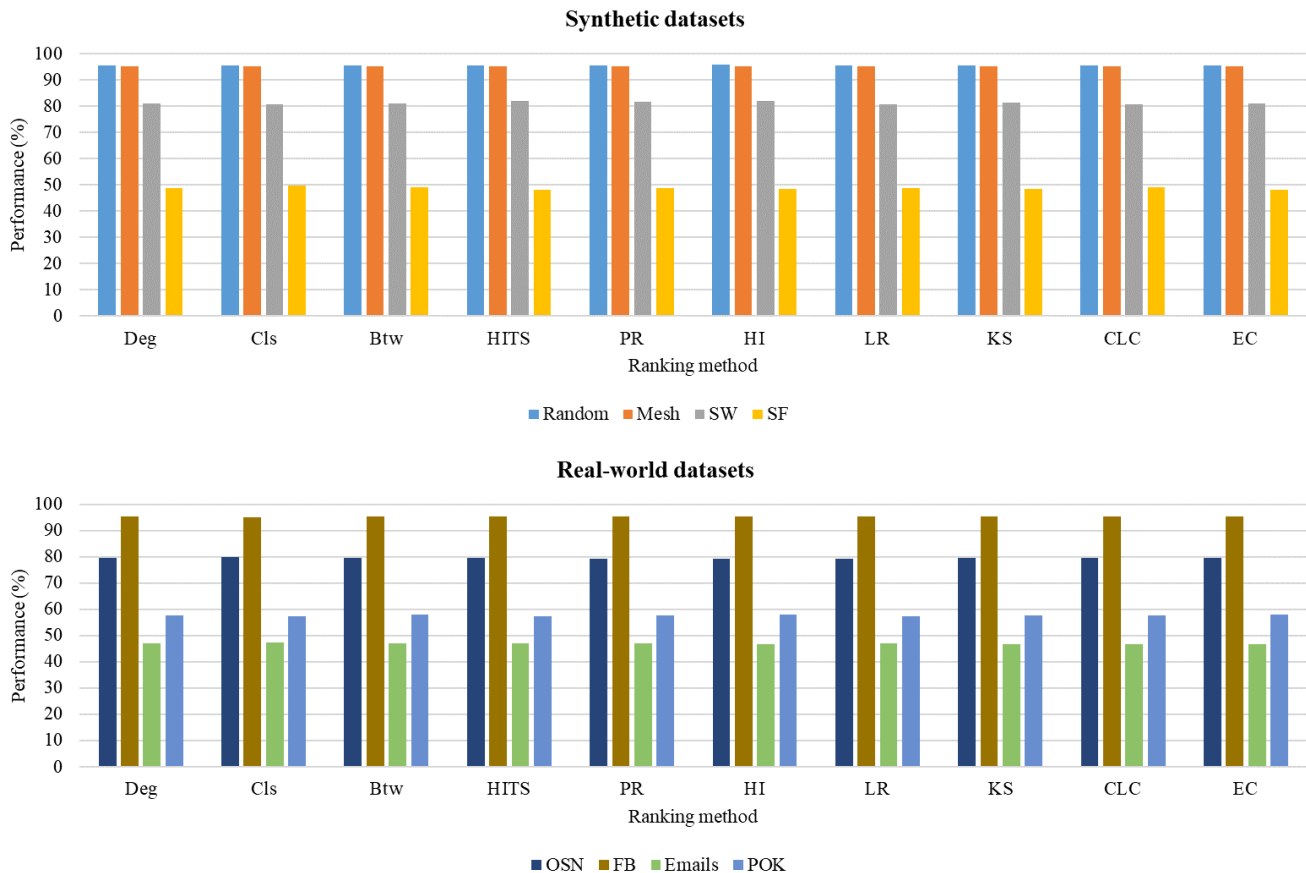

Figure 3. Performance (coverage 0-100%) of each ranking method on the 8 datasets using individual SIR benchmarking.

#### 5 Ranking method performances on each dataset for competition-based benchmarking

In Figure 4 we display the averaged benchmark performances of each ranking method, for the 8 individual datasets. On the synthetic datasets, we notice that Deg, HITS, PR and LR have overall both stable and good results ( $> 60\%$ ). On the other hand, Cls and KS have the weakest overall results ( $< 30\%$ ). Additionally, some measures present significant change based



66 on topology – EC increases in performance on scale-free networks; CLC is efficient only on mesh-like topologies; HI is  
 67 promising on meshes, weak on random networks, and moderately performant on small-worlds. On the real-world datasets, we  
 68 find high coverage stability for HITS and LR (63 – 67%), which also come out as the best ranking methods overall. Cls is  
 69 highly inefficient (< 10%), except on the POK dataset (47%), while EC is generally efficient (> 52%), except on the POK  
 70 dataset (34%). These results represent complex emergent opinion coverages that take into consideration the composition of  
 71 fundamental topologies found the real-world datasets, and their interpretation is beyond the scope of this paper.

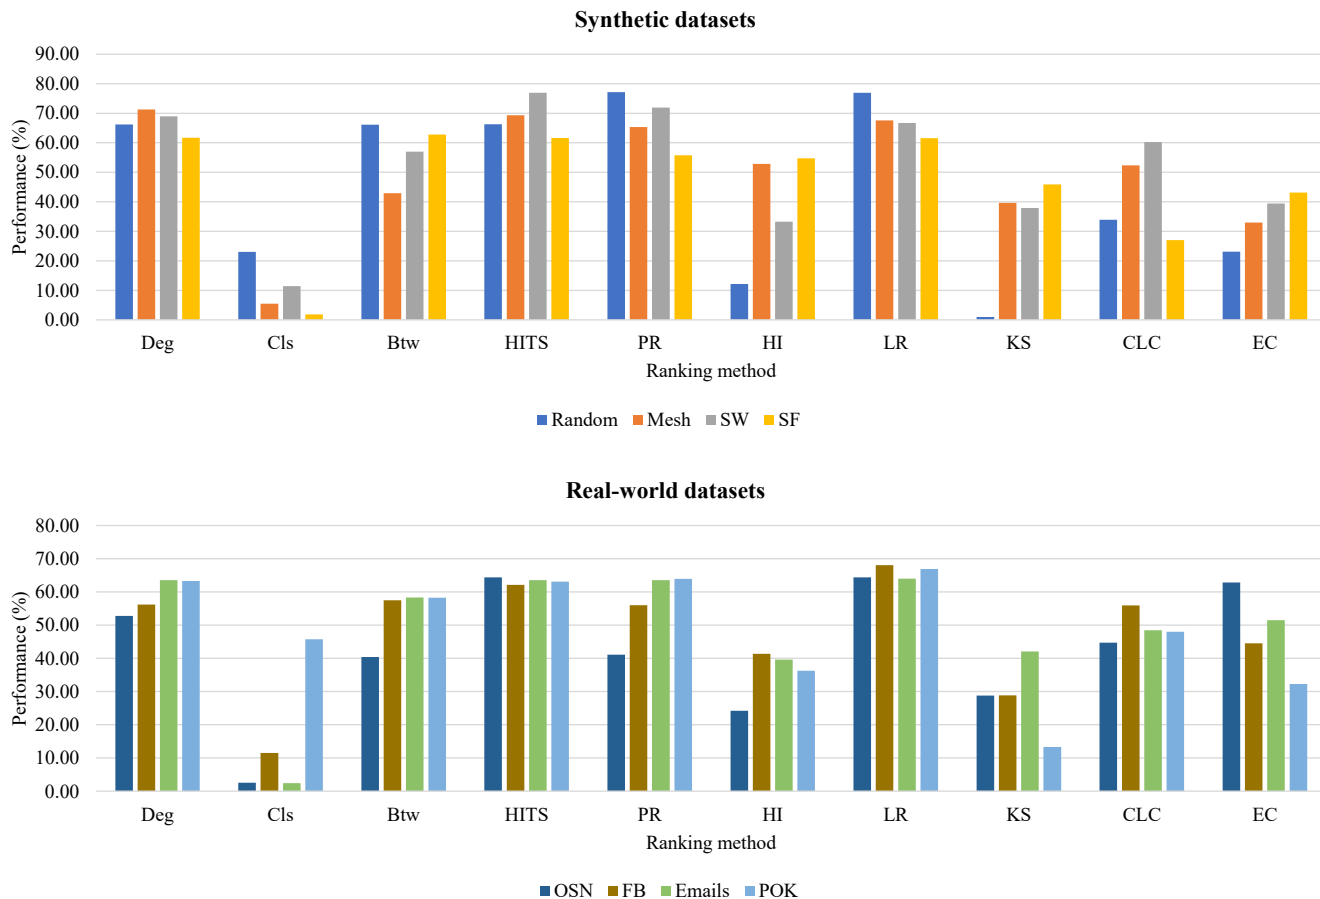

**Figure 4.** Performance (coverage 0-100%) of each ranking method on the 8 datasets using simultaneous competition-based benchmarking.

## 72 6 Alternative selection strategy for multiple spreaders

73 In order to present and validate our novel benchmarking methodology we have made use of existing state of the art ranking  
 74 methods, as well as a selection strategy for multiple spreaders. After a review of the most recent advances in complex network  
 75 analysis, we find that the method of simply selecting the top spreaders from the entire network is the most popular found  
 76 throughout literature, in the case of multiple spreader selection<sup>6,14-19</sup>. As such, in terms of validating our benchmarking  
 77 framework, we did not consider going into further details that were not the main goal of the paper.

78 Nevertheless, we find several alternatives for selecting multiple spreaders. Zhao *et al.* propose an innovative selection  
 79 method using the Welsh-Powell graph colouring algorithm<sup>20</sup>. It is shown that their method can improve the performances of  
 80 some well-known centralities, including degree, betweenness, closeness, and eigenvector centrality<sup>21</sup>. Nevertheless, there are  
 81 other alternatives for multiple spreader selection as well, like recalculating the centralities of nodes after every step of node  
 82 removal<sup>22</sup>, the degree discount algorithm<sup>23</sup>, the equal graph partitioning strategy<sup>24</sup>.

83 We have implemented the graph colouring method of Zhao *et al.*<sup>20</sup> to present a brief comparative analysis of the impact it  
 84 has in the overall benchmarking methodology and its results. Using the same three competitive simulation examples (Deg-LR,  
 85 LR-Btw, Cls-HI) as in the *Results* section, Figure 4, from our manuscript, we highlight here in Figure 5 the differences between

86 the two selection methods using visual examples. We refer to the simple method of selecting the top seeds from the entire  
 87 network as the *naïve method*, and to the method of Zhao *et al.*<sup>20</sup> as the *graph colouring* method.

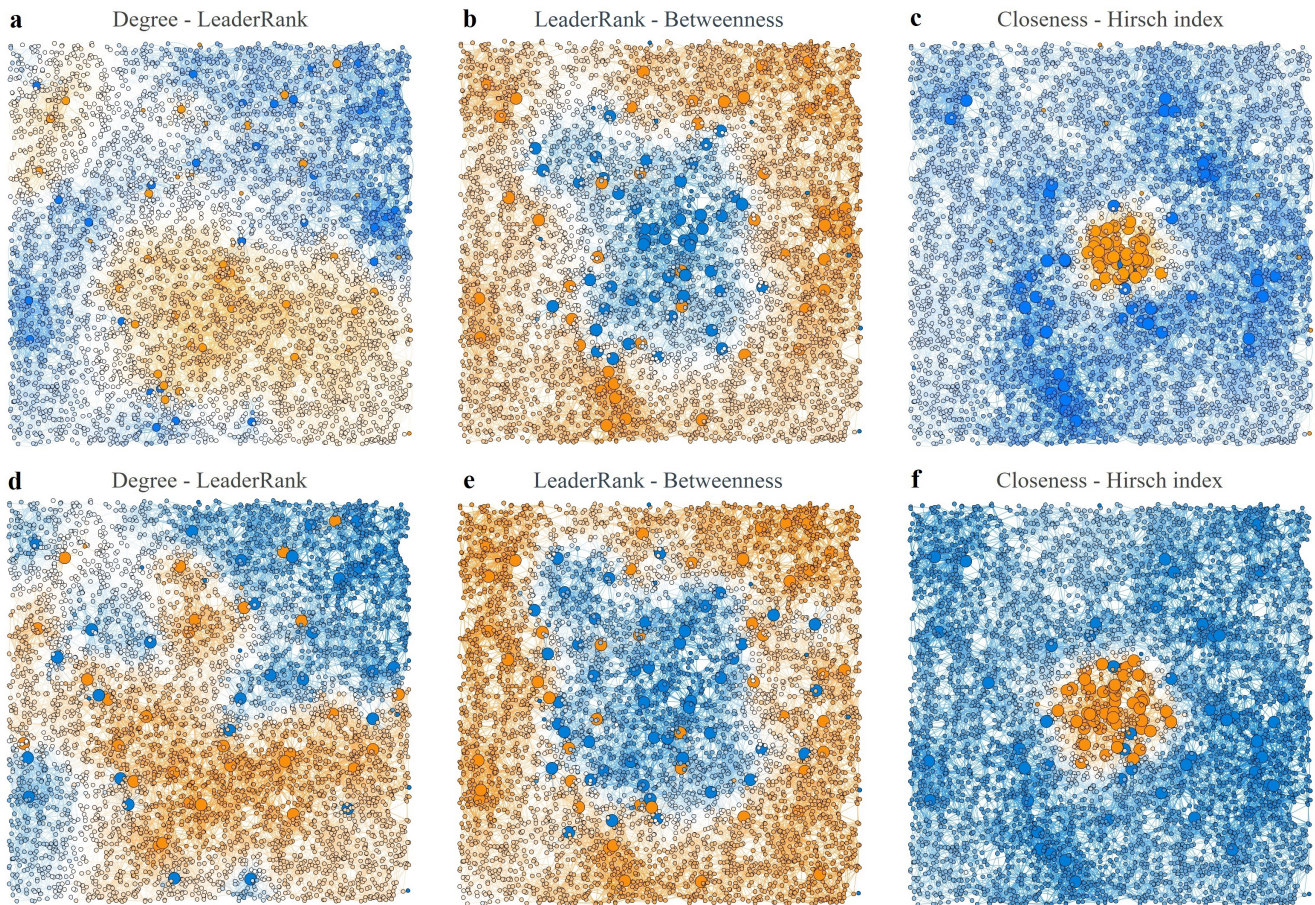

**Figure 5.** Comparison between the *naïve* (a-c) and *graph colouring* (d-f) methods using three competitive diffusion examples on the Mesh network (N=10,000 nodes). Larger nodes represent spreader nodes. The first centrality in the figure captions corresponds to orange opinion, and the second centrality to blue opinion.

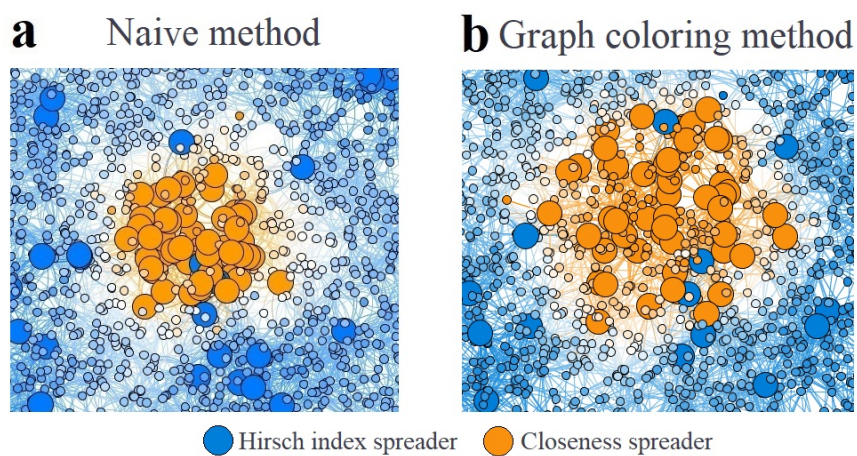

**Figure 6.** Difference in spreader spacing for closeness (orange) when switching from the *naïve* method (a) to the *graph colouring* method (b).



88 Analysing Figure 5 we notice a slightly different positioning of the spreader nodes (larger nodes) achieved with the *graph*  
 89 *colouring* method. This is especially visible in Figures 5 c and f, where the spreaders selected by closeness are more spaced  
 90 apart, yet the final distributions of the opinion (*i.e.*, centrality performances) are very similar when using either of the two  
 91 selection methods. Additionally, in Figure 6 we provide a close-up of the spreader selection for Closeness (corresponding to  
 92 Figures 5 c and f).

93 To sum up the results obtained for the two selection methods, in Table 3 we provide the numerical results for the three  
 94 simulation scenarios. Overall, we measure variations in final performance (%) of roughly 1-3%.

**Table 3.** Comparison between the *naïve* and *graph colouring* methods in terms of selecting spreader nodes. Performance is expressed as percentage (%) for each node centrality in three competitive simulation scenarios.

|   | Ranking method          | Naïve method   | Graph colouring |
|---|-------------------------|----------------|-----------------|
| 1 | Deg <i>versus</i><br>LR | 56.70<br>43.30 | 53.66<br>46.34  |
| 2 | LR <i>versus</i><br>Btw | 74.26<br>25.74 | 73.30<br>26.70  |
| 3 | Cls <i>versus</i><br>HI | 5.24<br>94.76  | 6.82<br>93.18   |

## 95 References

- 96 1. Wang, X. F. & Chen, G. Complex networks: small-world, scale-free and beyond. *IEEE circuits systems magazine* **3**, 6–20  
 97 (2003).
- 98 2. Newman, M. E. The structure and function of complex networks. *SIAM review* **45**, 167–256 (2003).
- 99 3. Kleinberg, J. M. Authoritative sources in a hyperlinked environment. *J. ACM (JACM)* **46**, 604–632 (1999).
- 100 4. Page, L., Brin, S., Motwani, R. & Winograd, T. The pagerank citation ranking: Bringing order to the web. Tech. Rep.,  
 101 Stanford InfoLab (1999).
- 102 5. Hirsch, J. E. An index to quantify an individual’s scientific research output. *Proc. Natl. academy Sci. United States Am.*  
 103 16569–16572 (2005).
- 104 6. Lü, L., Zhang, Y.-C., Yeung, C. H. & Zhou, T. Leaders in social networks, the delicious case. *PloS one* **6**, e21202 (2011).
- 105 7. Kitsak, M. *et al.* Identification of influential spreaders in complex networks. *Nat. physics* **6**, 888–893 (2010).
- 106 8. Zhao, X., Liu, F., Wang, J., Li, T. *et al.* Evaluating influential nodes in social networks by local centrality with a coefficient.  
 107 *ISPRS Int. J. Geo-Information* **6**, 35 (2017).
- 108 9. Bonacich, P. Some unique properties of eigenvector centrality. *Soc. networks* **29**, 555–564 (2007).
- 109 10. Udrescu, M. & Topirceanu, A. Probabilistic modeling of tolerance-based social network interaction. In *Network Intelligence*  
 110 *Conference (ENIC), 2016 Third European*, 48–54 (IEEE, 2016).
- 111 11. Topirceanu, A., Udrescu, M., Vladutiu, M. & Marculescu, R. Tolerance-based interaction: A new model targeting opinion  
 112 formation and diffusion in social networks. *PeerJ Comput. Sci.* **2**, e42 (2016).
- 113 12. Pastor-Satorras, R. & Vespignani, A. Epidemic spreading in scale-free networks. *Phys. review letters* **86**, 3200 (2001).
- 114 13. Newman, M. E. Spread of epidemic disease on networks. *Phys. review E* **66**, 016128 (2002).
- 115 14. Albert, R., Jeong, H. & Barabási, A.-L. Error and attack tolerance of complex networks. *nature* **406**, 378 (2000).
- 116 15. Cohen, R., Erez, K., Ben-Avraham, D. & Havlin, S. Breakdown of the internet under intentional attack. *Phys. review*  
 117 *letters* **86**, 3682 (2001).
- 118 16. Pastor-Satorras, R. & Vespignani, A. Immunization of complex networks. *Phys. Rev. E* **65**, 036104 (2002).
- 119 17. Chen, D.-B., Gao, H., Lü, L. & Zhou, T. Identifying influential nodes in large-scale directed networks: the role of clustering.  
 120 *PloS one* **8**, e77455 (2013).
- 121 18. Liu, J.-G., Lin, J.-H., Guo, Q. & Zhou, T. Locating influential nodes via dynamics-sensitive centrality. *Sci. reports* **6**  
 122 (2016).

- 123 **19.** Li, Q., Zhou, T., Lü, L. & Chen, D. Identifying influential spreaders by weighted leaderrank. *Phys. A: Stat. Mech. its Appl.*  
124 **404**, 47–55 (2014).
- 125 **20.** Zhao, X.-Y., Huang, B., Tang, M., Zhang, H.-F. & Chen, D.-B. Identifying effective multiple spreaders by coloring  
126 complex networks. *EPL (Europhysics Lett.* **108**, 68005 (2015).
- 127 **21.** Lü, L. *et al.* Vital nodes identification in complex networks. *Phys. Reports* **650**, 1–63 (2016).
- 128 **22.** Holme, P., Kim, B. J., Yoon, C. N. & Han, S. K. Attack vulnerability of complex networks. *Phys. review E* **65**, 056109  
129 (2002).
- 130 **23.** Chen, W., Wang, Y. & Yang, S. Efficient influence maximization in social networks. In *Proceedings of the 15th ACM*  
131 *SIGKDD international conference on Knowledge discovery and data mining*, 199–208 (ACM, 2009).
- 132 **24.** Chen, Y., Paul, G., Havlin, S., Liljeros, F. & Stanley, H. E. Finding a better immunization strategy. *Phys. review letters*  
133 **101**, 058701 (2008).
